# Supplementary material for: A newly defined risk signature, consisting of three m6A RNA methylation regulators, predicts the prognosis of ovarian cancer
Source: publisher site journal article supplement (doi:10.18632/aging.103811), 2020-09-20
Supplement: Supplementary file [file aging-v12i18-103811-supplementary-material-SD2.pdf]

## SUPPLEMENTARY TABLE

**Supplementary Table 1. Specific Information on the GSEA analysis of the three selected m<sup>6</sup>A RNA methylation regulators.**

| <b>m<sup>6</sup>A methylation regulators</b> | <b>Pathways</b>       | <b>NES</b> | <b>normalized P</b> |
|----------------------------------------------|-----------------------|------------|---------------------|
| IGF2BP1                                      | Pathways in cancer    | 1.83       | 0.006               |
|                                              | WNT signaling pathway | 1.91       | 0.004               |
| VIRMA                                        | Pathways in cancer    | 1.88       | 0.002               |
|                                              | WNT signaling pathway | 1.86       | 0.004               |
| ZC3H13                                       | Pathways in cancer    | 1.59       | 0.037               |
|                                              | WNT signaling pathway | 1.91       | 0.004               |

Pathways associated with IGF2BP1, VIRMA and ZC3H13.
